# Supplementary material
Source: Springer Nature journal article supplement (https://www.springermedizin.de/resource/supplementary/12875_2012_747_MOESM3_ESM.pdf/9435224)

Identification

Screening

Eligibility

Included

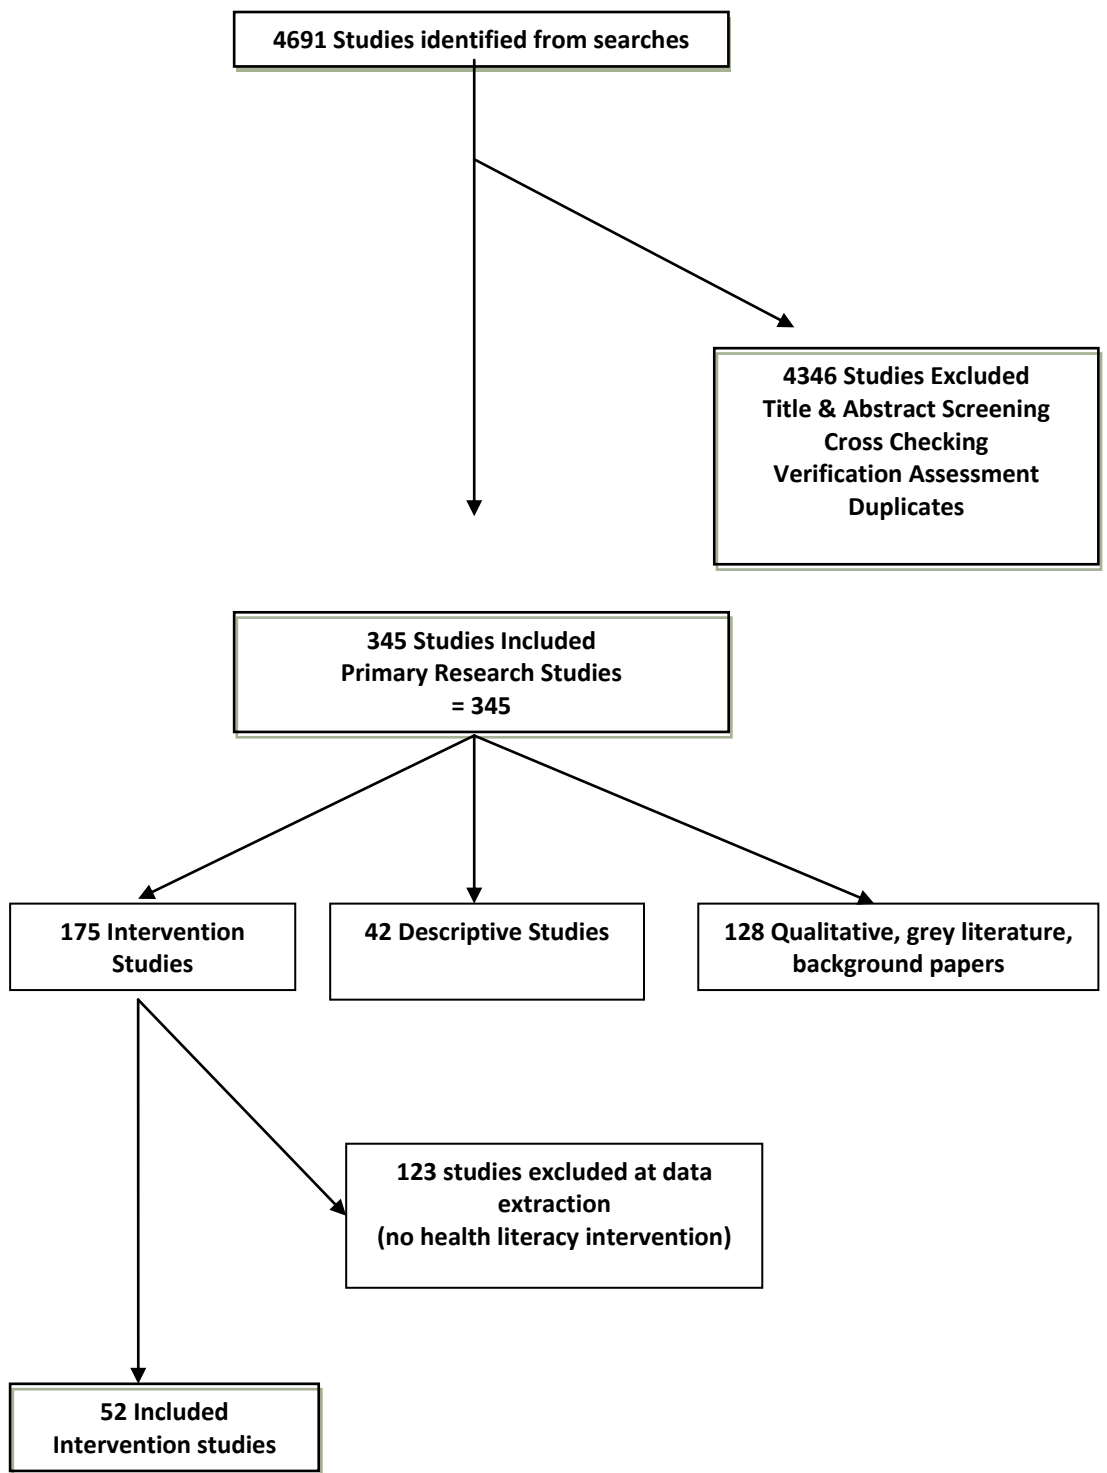

Supplement: MOESM3 [file 9435224]
